# Supplementary material for: Hydrothermal construction of WO3·0.33H2O/g-C3N4 nanocomposites with enhanced adsorption and photocatalytic activity
Source: Royal Society of Chemistry journal article supplement (doi:10.1039/d1ce01517f), 2022-01-01
Supplement: d1ce01517f1.pdf [file d1ce01517f1.pdf]

## Supplementary information

### Hydrothermal construction of $\text{WO}_3 \cdot 0.33\text{H}_2\text{O}/\text{g-C}_3\text{N}_4$ nanocomposites with enhanced adsorption and photocatalytic activity

Yuegang Shen,<sup>a</sup> Yangsi Liu,<sup>acd</sup> Xiaoli Xi<sup>\*ab</sup> and Zuoren Nie<sup>abc</sup>

<sup>a</sup> Collaborative Innovation Center of Capital Resource-Recycling Material Technology, Beijing University of Technology, Beijing 100124, China

<sup>b</sup> Key Laboratory of Advanced Functional Materials, Ministry of Education, Faculty of Materials and Manufacturing, Beijing University of Technology, Beijing 100124, China

<sup>c</sup> National Engineering Laboratory for Industrial Big-data Application Technology, Beijing University of Technology, Beijing 100124, China

<sup>d</sup> Beijing Guyue New Materials Research Institute, Beijing University of Technology, Beijing 100124, China

\*E-mail: xixiaoli@bjut.edu.cn (Prof. Dr. X. L. Xi)

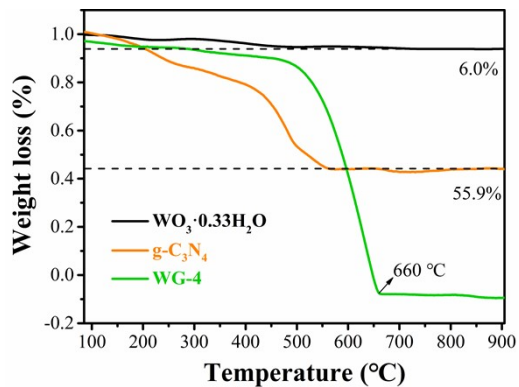

Fig. S1 TG curves of WO<sub>3</sub>·0.33H<sub>2</sub>O, g-C<sub>3</sub>N<sub>4</sub> and WG-4 nanocomposite.

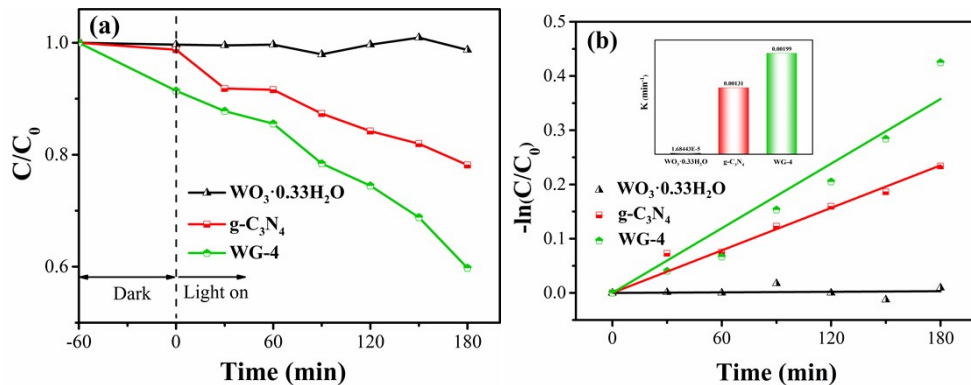

Fig. S2 Adsorption and photocatalytic degradation of RhB (a), plot of  $-\ln(C/C_0)$  versus time  $t$  and  $k$  values (b) of WO<sub>3</sub>·0.33H<sub>2</sub>O, g-C<sub>3</sub>N<sub>4</sub> and WG-4.

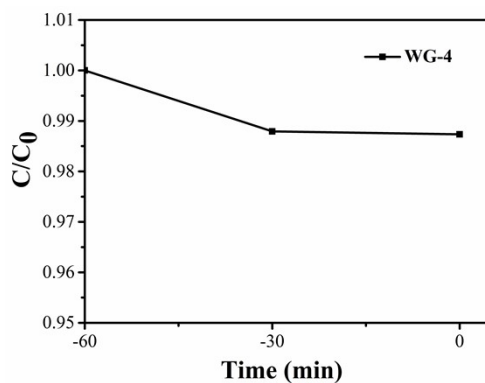

Fig. S3 Adsorption rate of MO (25 mg/L) by WG-4 nanocomposite.

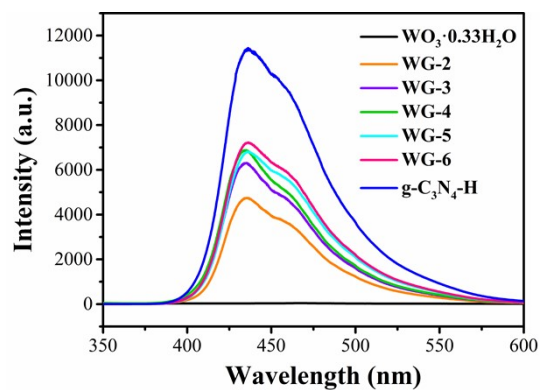

Fig. S4 PL spectra of  $\text{WO}_3 \cdot 0.33\text{H}_2\text{O}$ ,  $\text{g-C}_3\text{N}_4\text{-H}$  and  $\text{WO}_3 \cdot 0.33\text{H}_2\text{O}/\text{g-C}_3\text{N}_4$  nanocomposites.

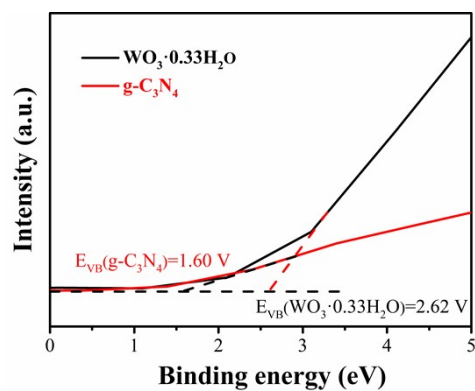

Fig. S5 XPS valence band edge spectra of  $\text{WO}_3 \cdot 0.33\text{H}_2\text{O}$  and  $\text{g-C}_3\text{N}_4$ .

Table S1 Specific surface area, pore volume, zeta potential and TRPL lifetime values of  $\text{WO}_3 \cdot 0.33\text{H}_2\text{O}$ ,  $\text{g-C}_3\text{N}_4$  and WG-4 nanocomposite.

| Sample                                     | Specific surface<br>areas/ $\text{m}^2 \text{g}^{-1}$ | Pore<br>volume/ $\text{cm}^3 \text{g}^{-1}$ | Zeta<br>potential/mV | $\tau_1/\text{ns}$ | $\tau_2/\text{ns}$ |
|--------------------------------------------|-------------------------------------------------------|---------------------------------------------|----------------------|--------------------|--------------------|
| $\text{WO}_3 \cdot 0.33\text{H}_2\text{O}$ | 2.50                                                  | 0.01                                        | -46.6                | 1.51               | 9.17               |
| $\text{g-C}_3\text{N}_4$                   | 31.65                                                 | 0.20                                        | -14.0                | 1.83               | 7.91               |
| WG-4                                       | 73.69                                                 | 0.40                                        | -40.4                | 7.87               | 2.24               |
